# Supplementary material for: Could Dietary Supplementation with Different Sources of N-3 Polyunsaturated Fatty Acids Modify the Rabbit Gut Microbiota?
Source: MDPI journal article supplement (doi:10.3390/antibiotics11020227), 2022-02-10
Supplement: s1 [file s1]

## Supplementary materials

**Table S1.** Significantly different taxa at the OTU level. OTUs are grouped per taxonomic level (from phylum to genus). Groups (n=5/group): control and enriched diets supplemented with flaxseed (flax) and fish oil (oil). P-values were obtained from a linear model that included the effects of treatment and tissue within rabbit.

| Level  | New taxa                              | Term      | P-value     |
|--------|---------------------------------------|-----------|-------------|
| Phylum | Bacteroidetes                         | Treatment | 0.025214434 |
| Phylum | Epsilonbacteraeota                    | Treatment | 0.001264694 |
| Class  | Bacteroidia                           | Treatment | 0.025214434 |
| Class  | Campylobacteria                       | Treatment | 0.001264694 |
| Class  | Negativicutes                         | Treatment | 0.028893502 |
| Order  | Bacteroidales                         | Treatment | 0.024852797 |
| Order  | Campylobacteriales                    | Treatment | 0.001264694 |
| Order  | Rhodobacterales                       | Treatment | 0.017630764 |
| Order  | Selenomonadales                       | Treatment | 0.028893502 |
| Family | Acidaminococcaceae                    | Treatment | 0.028893502 |
| Family | Arachis duranensis                    | Treatment | 0.045780306 |
| Family | Campylobacteraceae                    | Treatment | 0.012860544 |
| Family | Gut metagenome                        | Treatment | 0.041133323 |
| Family | Marinifilaceae                        | Treatment | 0.049934817 |
| Family | Rhodobacteraceae                      | Treatment | 0.017630764 |
| Family | Victivallaceae                        | Treatment | 0.041557662 |
| Genus  | [acetivibrio] ethanolgignens group    | Treatment | 0.022229071 |
| Genus  | [eubacterium] coprostanoligenes group | Treatment | 0.035170353 |
| Genus  | [eubacterium] xylanophilum group      | Treatment | 0.024695621 |
| Genus  | Acidovorax                            | Treatment | 0.001683302 |
| Genus  | Alistipes                             | Treatment | 0.049600553 |
| Genus  | Brevibacillus                         | Treatment | 0.019368428 |
| Genus  | Campylobacter                         | Treatment | 0.012860544 |
| Genus  | Falsirhodobacter                      | Treatment | 0.017630764 |
| Genus  | Lachnospiraceae ucg-001               | Treatment | 0.000672891 |
| Genus  | Mesorhizobium                         | Treatment | 0.023102407 |
| Genus  | Phascolarctobacterium                 | Treatment | 0.028893502 |
| Genus  | Ruminiclostridium 1                   | Treatment | 0.040451103 |
| Genus  | Victivallis                           | Treatment | 0.041557662 |

**Table S2.** Abundance of the significantly different taxa according with group and gastrointestinal tract.

| Level  | Taxon              | Treatment | Stomach | Duode-num | Jejunum | Ileum  | Caecum | Colon  |
|--------|--------------------|-----------|---------|-----------|---------|--------|--------|--------|
| Phylum | Bacteroidetes      | Control   | 128.96  | 162.25    | 126.77  | 180.53 | 377.32 | 398.90 |
| Phylum | Bacteroidetes      | Flaxseed  | 366.17  | 243.81    | 234.20  | 211.49 | 389.40 | 375.67 |
| Phylum | Bacteroidetes      | Fish oil  | 242.78  | 207.32    | 289.52  | 309.95 | 428.53 | 411.32 |
| Phylum | Epsilonbacteraeota | Control   | 2.10    | 1.92      | 0.72    | 2.68   | 8.06   | 8.24   |
| Phylum | Epsilonbacteraeota | Flaxseed  | 7.36    | 4.98      | 3.22    | 3.68   | 8.63   | 7.84   |
| Phylum | Epsilonbacteraeota | Fish oil  | 8.35    | 5.37      | 5.24    | 6.30   | 13.26  | 12.92  |
| Class  | Bacteroidia        | Control   | 128.96  | 162.25    | 126.77  | 180.53 | 377.32 | 398.90 |
| Class  | Bacteroidia        | Flaxseed  | 366.17  | 243.81    | 234.20  | 211.49 | 389.40 | 375.67 |
| Class  | Bacteroidia        | Fish oil  | 242.78  | 207.32    | 289.52  | 309.95 | 428.53 | 411.32 |
| Class  | Campylobacteria    | Control   | 2.10    | 1.92      | 0.72    | 2.68   | 8.06   | 8.24   |
| Class  | Campylobacteria    | Flaxseed  | 7.36    | 4.98      | 3.22    | 3.68   | 8.63   | 7.84   |
| Class  | Campylobacteria    | Fish oil  | 8.35    | 5.37      | 5.24    | 6.30   | 13.26  | 12.92  |
| Class  | Negativicutes      | Control   | 0.00    | 1.49      | 0.00    | 0.00   | 0.34   | 0.00   |
| Class  | Negativicutes      | Flaxseed  | 6.06    | 4.07      | 2.29    | 4.64   | 6.80   | 6.84   |
| Class  | Negativicutes      | Fish oil  | 0.49    | 1.64      | 0.94    | 2.29   | 2.16   | 1.54   |
| Order  | Bacteroidales      | Control   | 125.91  | 161.09    | 125.17  | 176.02 | 374.67 | 396.29 |
| Order  | Bacteroidales      | Flaxseed  | 359.87  | 240.31    | 230.67  | 209.70 | 386.98 | 372.66 |
| Order  | Bacteroidales      | Fish oil  | 237.97  | 204.57    | 289.26  | 308.66 | 427.85 | 410.97 |
| Order  | Campylobacterales  | Control   | 2.10    | 1.92      | 0.72    | 2.68   | 8.06   | 8.24   |
| Order  | Campylobacterales  | Flaxseed  | 7.36    | 4.98      | 3.22    | 3.68   | 8.63   | 7.84   |
| Order  | Campylobacterales  | Fish oil  | 8.35    | 5.37      | 5.24    | 6.30   | 13.26  | 12.92  |
| Order  | Rhodobacterales    | Control   | 0.00    | 0.00      | 0.00    | 0.00   | 0.00   | 0.00   |
| Order  | Rhodobacterales    | Flaxseed  | 0.00    | 0.84      | 0.51    | 1.42   | 0.00   | 0.00   |
| Order  | Rhodobacterales    | Fish oil  | 0.00    | 0.00      | 0.00    | 0.00   | 0.00   | 0.00   |
| Order  | Selenomonadales    | Control   | 0.00    | 1.49      | 0.00    | 0.00   | 0.34   | 0.00   |
| Order  | Selenomonadales    | Flaxseed  | 6.06    | 4.07      | 2.29    | 4.64   | 6.80   | 6.84   |
| Order  | Selenomonadales    | Fish oil  | 0.49    | 1.64      | 0.94    | 2.29   | 2.16   | 1.54   |
| Family | Acidaminococcaceae | Control   | 0.00    | 1.49      | 0.00    | 0.00   | 0.34   | 0.00   |
| Family | Acidaminococcaceae | Flaxseed  | 6.06    | 4.07      | 2.29    | 4.64   | 6.80   | 6.84   |
| Family | Acidaminococcaceae | Fish oil  | 0.49    | 1.64      | 0.94    | 2.29   | 2.16   | 1.54   |
| Family | Arachis duranensis | Control   | 0.00    | 0.00      | 0.00    | 0.00   | 0.00   | 0.00   |
| Family | Arachis duranensis | Flaxseed  | 0.00    | 0.00      | 0.00    | 0.00   | 0.00   | 0.00   |
| Family | Arachis duranensis | Fish oil  | 2.10    | 0.00      | 0.94    | 0.00   | 0.00   | 0.00   |
| Family | Campylobacteraceae | Control   | 2.10    | 1.92      | 0.72    | 1.73   | 8.06   | 8.24   |
| Family | Campylobacteraceae | Flaxseed  | 7.36    | 4.30      | 2.71    | 3.68   | 8.63   | 7.84   |
| Family | Campylobacteraceae | Fish oil  | 4.09    | 5.37      | 5.24    | 3.97   | 12.52  | 12.92  |
| Family | Gut metagenome     | Control   | 0.00    | 0.00      | 0.00    | 0.00   | 0.00   | 0.00   |
| Family | Gut metagenome     | Flaxseed  | 2.55    | 1.18      | 2.43    | 0.00   | 1.39   | 0.36   |
| Family | Gut metagenome     | Fish oil  | 0.00    | 0.65      | 0.00    | 0.00   | 0.00   | 0.00   |
| Family | Marinifilaceae     | Control   | 10.28   | 12.88     | 6.28    | 12.08  | 33.37  | 32.03  |
| Family | Marinifilaceae     | Flaxseed  | 31.98   | 15.53     | 16.79   | 18.05  | 31.01  | 28.36  |
| Family | Marinifilaceae     | Fish oil  | 26.80   | 14.23     | 21.19   | 23.02  | 39.55  | 34.78  |

Curone et al. *Could Dietary Supplementation With Different Sources of N-3 Polyunsaturated Fatty Acids Modify the Rabbit Gut Microbiota?*

|        |                                            |          |       |       |       |       |       |       |
|--------|--------------------------------------------|----------|-------|-------|-------|-------|-------|-------|
| Family | Rhodobacteraceae                           | Control  | 0.00  | 0.00  | 0.00  | 0.00  | 0.00  | 0.00  |
| Family | Rhodobacteraceae                           | Flaxseed | 0.00  | 0.84  | 0.51  | 1.42  | 0.00  | 0.00  |
| Family | Rhodobacteraceae                           | Fish oil | 0.00  | 0.00  | 0.00  | 0.00  | 0.00  | 0.00  |
| Family | Victivallaceae                             | Control  | 0.72  | 0.63  | 0.53  | 0.91  | 3.00  | 2.76  |
| Family | Victivallaceae                             | Flaxseed | 5.16  | 6.20  | 6.73  | 3.47  | 3.01  | 3.51  |
| Family | Victivallaceae                             | Fish oil | 0.76  | 3.89  | 1.78  | 1.70  | 2.38  | 1.08  |
| Genus  | [acetivibrio] ethanolgi-<br>gnens group    | Control  | 0.78  | 2.24  | 0.69  | 2.37  | 3.19  | 3.11  |
| Genus  | [acetivibrio] ethanolgi-<br>gnens group    | Flaxseed | 3.59  | 3.11  | 3.73  | 1.67  | 2.82  | 3.65  |
| Genus  | [acetivibrio] ethanolgi-<br>gnens group    | Fish oil | 1.22  | 1.33  | 2.54  | 2.08  | 3.12  | 2.37  |
| Genus  | [eubacterium] coprosta-<br>noligenes group | Control  | 5.00  | 7.03  | 5.43  | 5.85  | 19.62 | 22.51 |
| Genus  | [eubacterium] coprosta-<br>noligenes group | Flaxseed | 16.33 | 7.86  | 5.07  | 5.56  | 16.48 | 17.11 |
| Genus  | [eubacterium] coprosta-<br>noligenes group | Fish oil | 18.02 | 13.29 | 21.98 | 13.20 | 29.22 | 28.66 |
| Genus  | [eubacterium] xylano-<br>philum group      | Control  | 3.37  | 6.00  | 2.18  | 4.30  | 12.31 | 16.54 |
| Genus  | [eubacterium] xylano-<br>philum group      | Flaxseed | 9.61  | 7.71  | 13.47 | 4.03  | 12.24 | 12.85 |
| Genus  | [eubacterium] xylano-<br>philum group      | Fish oil | 7.93  | 11.41 | 13.22 | 11.40 | 13.64 | 13.48 |
| Genus  | Acidovorax                                 | Control  | 0.00  | 0.00  | 0.00  | 0.00  | 0.00  | 0.00  |
| Genus  | Acidovorax                                 | Flaxseed | 0.00  | 1.12  | 0.85  | 2.13  | 0.00  | 0.00  |
| Genus  | Acidovorax                                 | Fish oil | 0.00  | 0.00  | 0.00  | 0.00  | 0.00  | 0.00  |
| Genus  | Alistipes                                  | Control  | 25.13 | 34.56 | 16.68 | 32.65 | 80.61 | 86.72 |
| Genus  | Alistipes                                  | Flaxseed | 83.00 | 50.06 | 47.67 | 27.43 | 83.46 | 86.03 |
| Genus  | Alistipes                                  | Fish oil | 47.79 | 44.95 | 61.74 | 67.82 | 90.20 | 91.06 |
| Genus  | Brevibacillus                              | Control  | 5.92  | 2.41  | 2.43  | 0.67  | 0.00  | 0.00  |
| Genus  | Brevibacillus                              | Flaxseed | 0.63  | 0.00  | 0.00  | 0.97  | 0.00  | 0.00  |
| Genus  | Brevibacillus                              | Fish oil | 2.27  | 1.30  | 2.08  | 2.36  | 0.40  | 0.00  |
| Genus  | Campylobacter                              | Control  | 2.10  | 1.92  | 0.72  | 1.73  | 8.06  | 8.24  |
| Genus  | Campylobacter                              | Flaxseed | 7.36  | 4.30  | 2.71  | 3.68  | 8.63  | 7.84  |
| Genus  | Campylobacter                              | Fish oil | 4.09  | 5.37  | 5.24  | 3.97  | 12.52 | 12.92 |
| Genus  | Falsirhodobacter                           | Control  | 0.00  | 0.00  | 0.00  | 0.00  | 0.00  | 0.00  |
| Genus  | Falsirhodobacter                           | Flaxseed | 0.00  | 0.84  | 0.51  | 1.42  | 0.00  | 0.00  |
| Genus  | Falsirhodobacter                           | Fish oil | 0.00  | 0.00  | 0.00  | 0.00  | 0.00  | 0.00  |
| Genus  | Lachnospiraceae ucg-001                    | Control  | 7.55  | 4.95  | 3.35  | 4.28  | 7.04  | 4.33  |
| Genus  | Lachnospiraceae ucg-001                    | Flaxseed | 10.53 | 4.14  | 6.37  | 3.05  | 8.89  | 6.80  |
| Genus  | Lachnospiraceae ucg-001                    | Fish oil | 0.79  | 0.65  | 1.19  | 2.35  | 4.85  | 2.75  |
| Genus  | Mesorhizobium                              | Control  | 0.00  | 0.00  | 0.00  | 0.00  | 0.00  | 0.00  |
| Genus  | Mesorhizobium                              | Flaxseed | 0.00  | 0.38  | 2.20  | 2.09  | 0.00  | 0.00  |
| Genus  | Mesorhizobium                              | Fish oil | 0.30  | 0.60  | 0.77  | 0.00  | 0.00  | 0.00  |
| Genus  | Phascolarctobacterium                      | Control  | 0.00  | 1.49  | 0.00  | 0.00  | 0.34  | 0.00  |
| Genus  | Phascolarctobacterium                      | Flaxseed | 6.06  | 4.07  | 2.29  | 4.64  | 6.80  | 6.84  |
| Genus  | Phascolarctobacterium                      | Fish oil | 0.49  | 1.64  | 0.94  | 2.29  | 2.16  | 1.54  |
| Genus  | Ruminiclostridium 1                        | Control  | 1.59  | 1.15  | 0.00  | 0.00  | 7.49  | 7.94  |
| Genus  | Ruminiclostridium 1                        | Flaxseed | 4.07  | 2.25  | 2.64  | 1.93  | 6.57  | 6.46  |

Curone et al. *Could Dietary Supplementation With Different Sources of N-3 Polyunsaturated Fatty Acids Modify the Rabbit Gut Microbiota?*

|       |                     |          |      |      |      |      |       |       |
|-------|---------------------|----------|------|------|------|------|-------|-------|
| Genus | Ruminiclostridium 1 | Fish oil | 3.11 | 2.27 | 3.77 | 2.48 | 12.77 | 11.44 |
| Genus | Victivallis         | Control  | 0.72 | 0.63 | 0.53 | 0.91 | 3.00  | 2.76  |
| Genus | Victivallis         | Flaxseed | 5.16 | 6.20 | 6.73 | 3.47 | 3.01  | 3.51  |
| Genus | Victivallis         | Fish oil | 0.76 | 3.89 | 1.78 | 1.70 | 2.38  | 1.08  |

**Table S3. Between-treatment differences along the rabbit's gastrointestinal tract, for the significantly different taxa identified in Figure 3.** Difference is marked by "1", lack of difference by "0". Between-treatment differences were evaluated by linear models of abundance as a function of treatments, run separately for each intestinal segment. Given that within-segment models were based on a smaller number of samples, p-values may differ from those in Figure 3.

| Level  | New taxa                              | Sto-<br>mach | Duode-<br>num | Je-<br>junum | Ileum | Caecum | Colon |
|--------|---------------------------------------|--------------|---------------|--------------|-------|--------|-------|
| Class  | Bacteroidia                           | 1            | 0             | 0            | 1     | 0      | 0     |
| Class  | Campylobacteria                       | 1            | 0             | 0            | 0     | 1      | 1     |
| Class  | Negativicutes                         | 1            | 0             | 0            | 1     | 1      | 1     |
| Family | Acidaminococcaceae                    | 1            | 0             | 0            | 1     | 1      | 1     |
| Family | Arachis duranensis                    | 1            | 0             | 0            | 0     | 0      | 0     |
| Family | Campylobacteraceae                    | 1            | 0             | 0            | 0     | 1      | 1     |
| Family | Gut metagenome                        | 1            | 0             | 1            | 0     | 1      | 0     |
| Family | Marinifilaceae                        | 1            | 0             | 0            | 1     | 0      | 0     |
| Family | Rhodobacteraceae                      | 0            | 0             | 0            | 1     | 0      | 0     |
| Family | Victivallaceae                        | 1            | 1             | 1            | 0     | 0      | 0     |
| Genus  | [acetivibrio] ethanolgignens group    | 1            | 0             | 1            | 0     | 0      | 1     |
| Genus  | [eubacterium] coprostanoligenes group | 0            | 0             | 1            | 0     | 1      | 0     |
| Genus  | [eubacterium] xylanophilum group      | 0            | 0             | 1            | 1     | 0      | 0     |
| Genus  | Acidovorax                            | 0            | 1             | 0            | 1     | 0      | 0     |
| Genus  | Alistipes                             | 1            | 0             | 0            | 1     | 0      | 0     |
| Genus  | Brevibacillus                         | 1            | 0             | 0            | 0     | 0      | 0     |
| Genus  | Campylobacter                         | 1            | 0             | 0            | 0     | 1      | 1     |
| Genus  | Falsirhodobacter                      | 0            | 0             | 0            | 1     | 0      | 0     |
| Genus  | Lachnospiraceae ucg-001               | 0            | 1             | 1            | 0     | 0      | 1     |
| Genus  | Mesorhizobium                         | 0            | 0             | 1            | 1     | 0      | 0     |
| Genus  | Phascolarctobacterium                 | 1            | 0             | 0            | 1     | 1      | 1     |
| Genus  | Ruminiclostridium 1                   | 0            | 0             | 0            | 0     | 1      | 1     |
| Genus  | Victivallis                           | 1            | 1             | 1            | 0     | 0      | 0     |
| Order  | Bacteroidales                         | 1            | 0             | 0            | 1     | 0      | 0     |
| Order  | Campylobacterales                     | 1            | 0             | 0            | 0     | 1      | 1     |
| Order  | Rhodobacterales                       | 0            | 0             | 0            | 1     | 0      | 0     |
| Order  | Selenomonadales                       | 1            | 0             | 0            | 1     | 1      | 1     |
| Phylum | Bacteroidetes                         | 1            | 0             | 0            | 1     | 0      | 0     |
| Phylum | Epsilonbacteraeota                    | 1            | 0             | 0            | 0     | 1      | 1     |

**Table S4.** Coefficient estimates and p-values for the F/B ratio in treatments vs control (benchmark), from a linear model which included the effects of tissue and treatment

| Tissue   | Term          | Estimate | Std.error | Statistic | P.value |
|----------|---------------|----------|-----------|-----------|---------|
| Stomach  | Treatmentflax | -2.2538  | 1.1111    | -2.0284   | 0.0731  |
| Stomach  | Treatmentoil  | -2.4081  | 1.1111    | -2.1673   | 0.0584  |
| Duodenum | Treatmentflax | -2.1778  | 1.0302    | -2.1140   | 0.0637  |
| Duodenum | Treatmentoil  | -2.1034  | 1.0302    | -2.0418   | 0.0716  |
| Jejunum  | Treatmentflax | -0.1000  | 1.6258    | -0.0615   | 0.9523  |
| Jejunum  | Treatmentoil  | -1.8060  | 1.6258    | -1.1108   | 0.2954  |
| Ileum    | Treatmentflax | -0.2373  | 0.6434    | -0.3688   | 0.7219  |
| Ileum    | Treatmentoil  | -1.4041  | 0.6950    | -2.0204   | 0.0780  |
| Caecum   | Treatmentflax | -0.4003  | 0.3091    | -1.2950   | 0.2276  |
| Caecum   | Treatmentoil  | -0.4657  | 0.3091    | -1.5065   | 0.1662  |
| Colon    | Treatmentflax | 0.0167   | 0.4029    | 0.0415    | 0.9678  |
| Colon    | Treatmentoil  | -0.8334  | 0.4029    | -2.0687   | 0.0685  |

**Table S5.** Significance of differences between treatments in terms of Bray-Curtis distances for each section of the rabbit's digestive tract.

| Tissue   | Term       | Df | Sums Of Sqs  | Mean Sqs      | F. Model     | R2           | Pr (>F) |
|----------|------------|----|--------------|---------------|--------------|--------------|---------|
| Ileum    | Treatment  | 2  | 0.2255021456 | 0.1127510728  | 0.8902435703 | 0.1820448322 | 0.707   |
| Ileum    | Residuals  | 8  | 1.013215498  | 0.1266519373  |              | 0.8179551678 |         |
| Ileum    | Total      | 10 | 1.238717644  |               |              | 1            |         |
| Jejunum  | Treatment1 | 2  | 0.3289109197 | 0.1644554598  | 1.230255812  | 0.2146947453 | 0.224   |
| Jejunum  | Residuals1 | 9  | 1.203082419  | 0.1336758244  |              | 0.7853052547 |         |
| Jejunum  | Total1     | 11 | 1.531993339  |               |              | 1            |         |
| Duodenum | Treatment2 | 2  | 0.2372168078 | 0.1186084039  | 0.8930619657 | 0.1655946049 | 0.761   |
| Duodenum | Residuals2 | 9  | 1.195298508  | 0.1328109453  |              | 0.8344053951 |         |
| Duodenum | Total2     | 11 | 1.432515316  |               |              | 1            |         |
| Colon    | Treatment3 | 2  | 0.1333038994 | 0.06665194969 | 1.061601843  | 0.1908805904 | 0.255   |
| Colon    | Residuals3 | 9  | 0.5650588786 | 0.06278431985 |              | 0.8091194096 |         |
| Colon    | Total3     | 11 | 0.698362778  |               |              | 1            |         |
| Caecum   | Treatment4 | 2  | 0.1237146091 | 0.06185730456 | 1.045274793  | 0.1884982859 | 0.260   |
| Caecum   | Residuals4 | 9  | 0.5326022827 | 0.05917803141 |              | 0.8115017141 |         |
| Caecum   | Total4     | 11 | 0.6563168918 |               |              | 1            |         |
| Stomach  | Treatment5 | 2  | 0.5207751034 | 0.2603875517  | 2.00842282   | 0.3085882518 | 0.010   |
| Stomach  | Residuals5 | 9  | 1.166829983  | 0.1296477759  |              | 0.6914117482 |         |
| Stomach  | Total5     | 11 | 1.687605087  |               |              | 1            |         |

**Table S6.** Fatty acids profile (% of total fatty acids) as of control and n-3 enriched diets.

| Fatty acids            | Control | Flax seed          | Fish Oil           | Pooled SE |
|------------------------|---------|--------------------|--------------------|-----------|
| SFA                    | 19.80   | 15.40              | 38.10              | 1.82      |
| MUFA                   | 17.40   | 15.80              | 14.50              | 0.87      |
| PUFA                   | 62.80   | 68.80              | 47.40 <sub>b</sub> | 5.12      |
| LA                     | 50.45   | 22.30 <sub>a</sub> | 20.50              | 2.11      |
| ALA                    | 11.15   | 45.80              | 18.50              | 1.42      |
| LC PUFA <sub>n-3</sub> | -       | -                  | 10.50              | 1.00      |
| EPA                    | -       | -                  | 3.50               | 0.21      |
| DHA                    | -       | -                  | 4.20               | 0.28      |
| n-6                    | 51.45   | 22.80              | 21.00              | 2.35      |
| n-3                    | 11.35   | 46.00              | 26.40              | 1.55      |
| n-6/n-3                | 4.53    | 0.50               | 0.80 <sub>a</sub>  | 0.01      |

Legend: SFA, saturated fatty acids; MUFA, monounsaturated fatty acids; PUFA, polyunsaturated fatty acids; LA, linoleic acid; ALA,  $\alpha$ -linolenic acid; LC PUFA, Long Chain PUFA; EPA, eicosapentaenoic acid; DHA, docosahexaenoic acid.



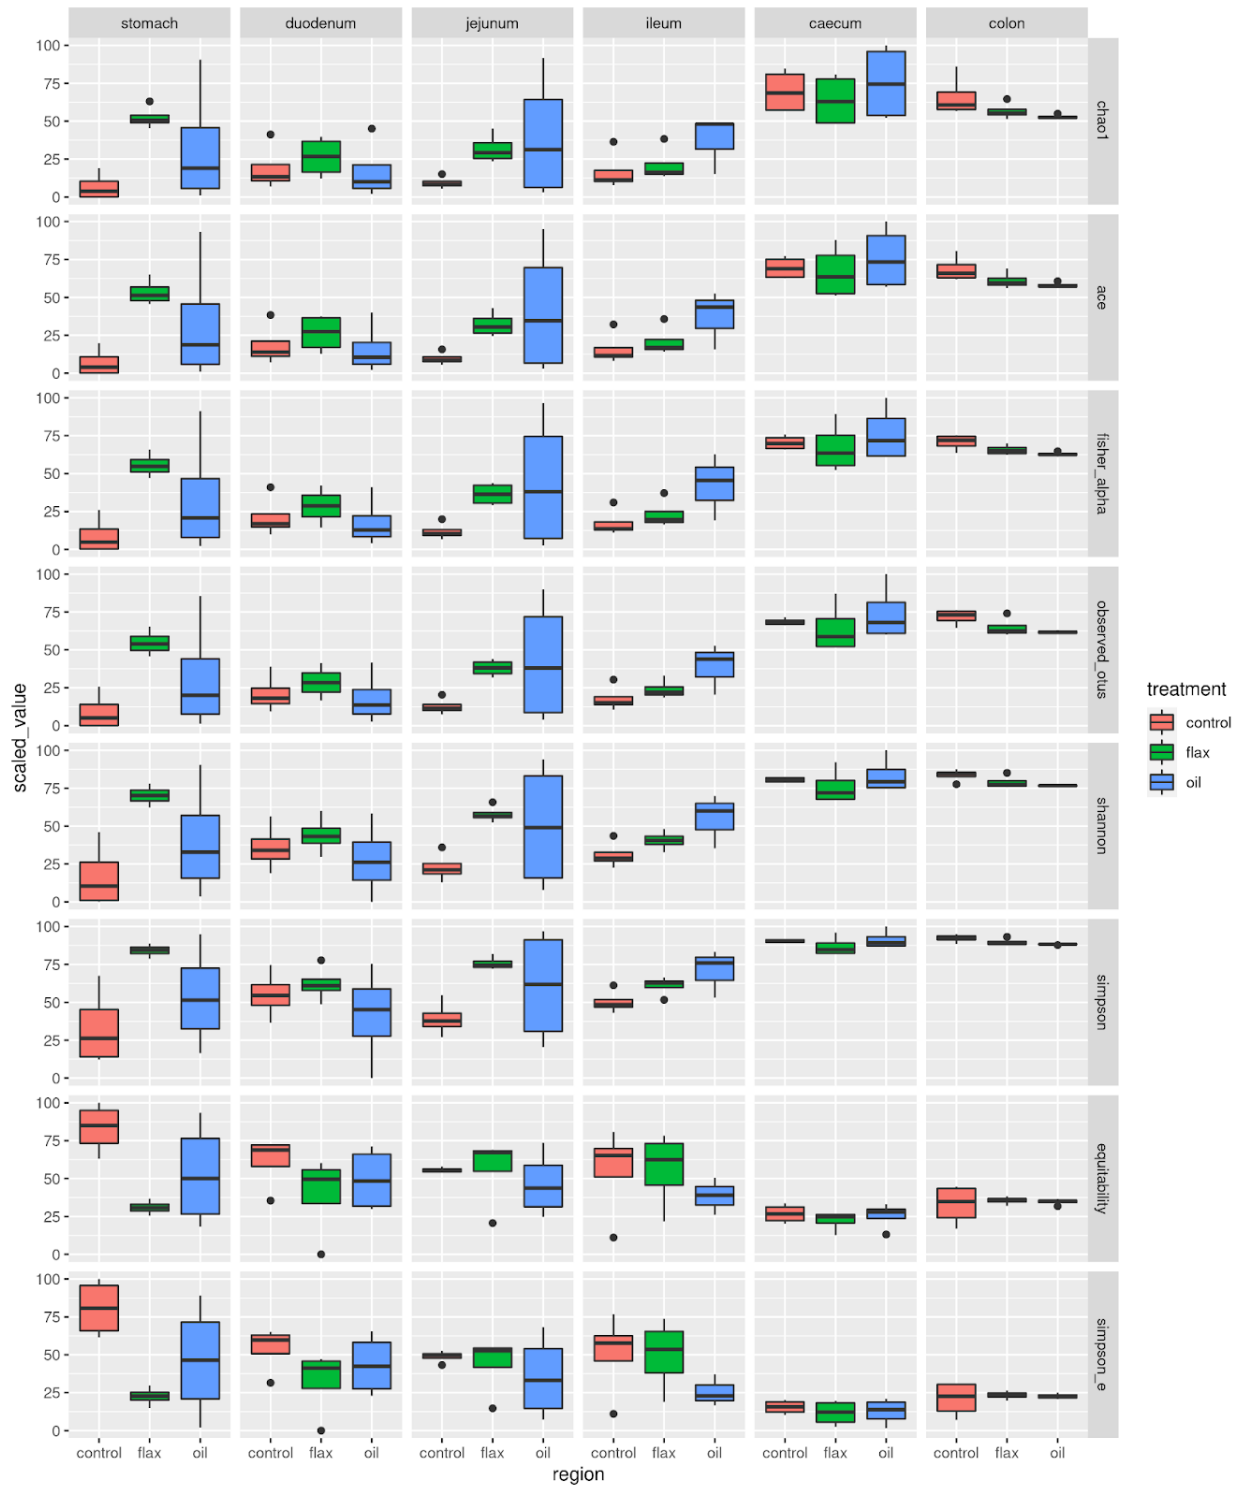

**Figure S1.** Boxplot of the alpha diversity indices in the three groups (red: control; gree: flax-supplemented diet; blue: oil-supplemented diet) in the digestive system of rabbits.
